# Supplementary material for: Diurnal variation in an amplified canopy urban heat island during heat wave periods in the megacity of Beijing: roles of mountain–valley breeze and urban morphology
Source: Copernicus journal article supplement (doi:10.5194/acp-24-12807-2024), 2024-11-19
Supplement: Supplementary file 1 [file acp-24-12807-2024-supplement.pdf]

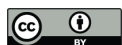

*Supplement of*

**Diurnal variation in an amplified canopy urban heat island during heat wave periods in the megacity of Beijing: roles of mountain–valley breeze and urban morphology**

Tao Shi et al.

*Correspondence to:* Yuanjian Yang (yyj1985@nuist.edu.cn)

The copyright of individual parts of the supplement might differ from the article licence.

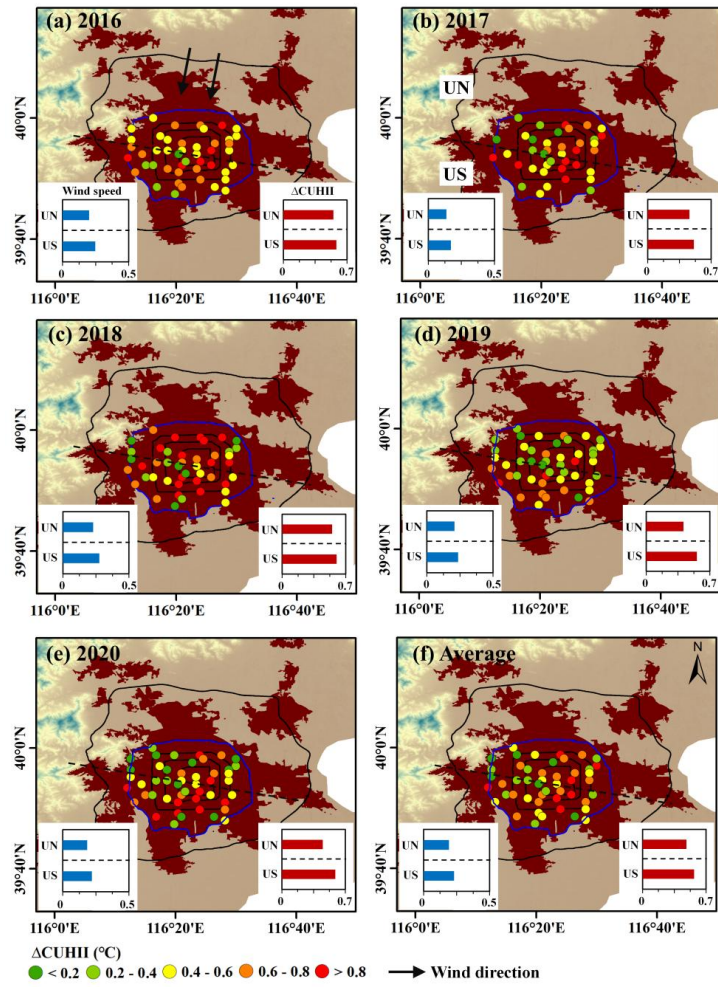

Figure: S1 During the mountain breeze phase, the spatial patterns of the  $\Delta\text{CUHII}$ . (a) 2016, (b) 2017, (c) 2018, (d) 2019, (e) 2020, (f) average value from 2016 to 2020. Different colored dots represent different ranks of the  $\Delta\text{CUHII}$ .

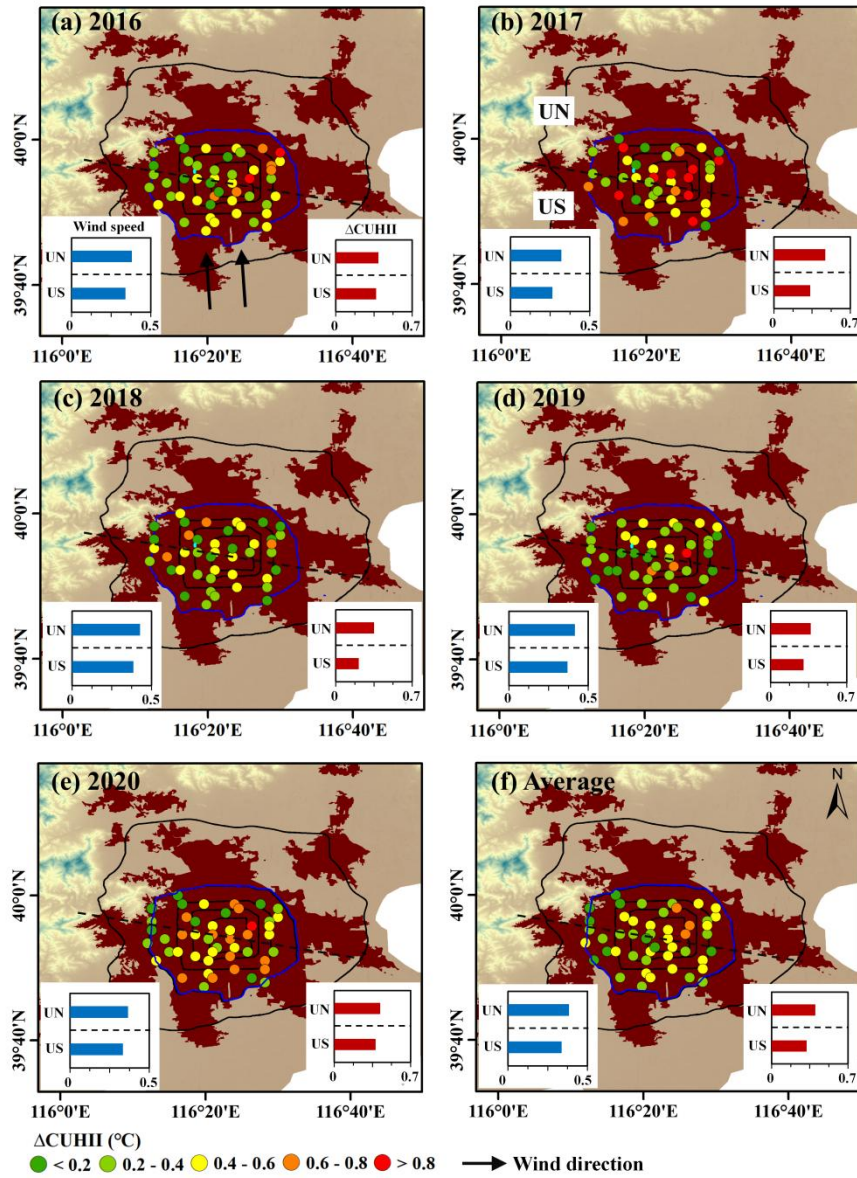

Figure: S2 During the valley breeze phase, the spatial patterns of the  $\Delta CUHII$ . (a) 2016, (b) 2017, (c) 2018, (d) 2019, (e) 2020, (f) average value from 2016 to 2020. Different colored dots represent different ranks of the  $\Delta CUHII$ .
